1 Date palm virus A: first plant virus found in date palm trees

2 Ayoub Maachi <sup>1</sup>, Tatsuya Nagata <sup>2</sup>, João Marcos Fagundes Silva <sup>2,\*</sup>

3 <sup>1</sup> Abiopep S.L., R&D Department, Espinardo 30100, Murcia, Spain

4 <sup>2</sup> University of Brasília (UnB), Institute of Biological Sciences, Department of Cell Biology, Brasília 70910-  
5 900, Federal District, Brazil

6 \* Correspondence: joaomarcos.fagundes@gmail.com

## 7 **Abstract**

8 In this work, a novel ssRNA (+) viral genomic sequence with gene organization typical of members of the  
9 subfamily *Quinvirinae* (family *Betaflexiviridae*) was identified using high throughput sequencing data of  
10 date palm obtained from the Sequence Read Archive database. The viral genome sequence consists of 7860  
11 nucleotides and contains five ORFs encoding for the replication protein (Rep), triple gene block proteins 1,  
12 2, 3 (TGB 1, 2 and 3) and coat protein (CP). Phylogenetic analysis based on the Rep and the CP amino acid  
13 sequences showed the closest relationship to garlic yellow mosaic-associated virus (GYMaV). Based on  
14 the demarcation criteria of the family *Betaflexiviridae*, this new virus, provisionally named date palm virus  
15 A (DPVA), could constitute a member of a novel genus. However, considering that DPVA and GYMaV  
16 share the same genomic organization and that they cluster together on the Rep phylogenetic analysis, they  
17 could also constitute a novel genus together, highlighting the necessity of a revision of the taxonomic  
18 criteria of the family *Betaflexiviridae*.

19 Keywords: date palm virus A, *Betaflexiviridae*, high throughput sequencing, new genus, new species

## 20 **Text**

21 Virus members of the family *Betaflexiviridae* have flexuous filament virions and ssRNA (+) genome,  
22 ranging 5.9-9.0 kb. The genomic RNA is presumably capped at the 5' end and has a polyadenylated tail at  
23 the 3' end [1]. Betaflexiviruses were reported from a diverse host range of plant species, from vegetable  
24 crops to fruit trees [1]. Date palm tree, a crop intensively cultivated and of major economic importance in  
25 Northern African and Middle East countries [2], is very robust and, until now, no virus whatsoever was  
26 reported to infect this plant species. Only African oil palm ringspot virus of this family was reported to  
27 infect palm trees (family: *Arecaceae*) [3,4], however, no reports was found about the occurrence of this  
28 virus in palm tree. Here, a plant virus sequence was found in high throughput sequencing (HTS) data of  
29 date palm trees (*Phoenix dactylifera*) from the Sequence Read Archive (SRA) public database. Thus, we  
30 report the characteristics of the genomic sequence of a novel virus belonging to the family *Betaflexiviridae*,  
31 tentatively named date palm virus A.

32 Raw transcriptomic data from SRA under the NCBI BioProject number PRJNA472694, used for  
33 comparison of gene expression in male and female date palm flowers, were trimmed with BBDuk v38.08  
34 to remove adapters and low-quality sequences. The resulting reads were mapped against the date palm

35 sequence under the RefSeq assembly accession number GCF\_000413155.1 using Burrows-Wheeler  
36 Aligner (BWA) [5], then all mapped sequences were removed from the datasets. A total number of  
37 130,973,904 filtered and trimmed paired reads with a read length of 75 bp were *de novo* assembled using  
38 MEGAHIT [6]. A total of 25,005 contigs ranging from 200 to 8523 nt long were queried against the virus  
39 RefSeq database using tBLASTx [7]. A contig of 7774 nt long was aligned to the replication protein of  
40 cherry green ring mottle virus with the amino acid (aa) sequence identity of 41.8%. Iterative read mapping  
41 function in Geneious 8.1.9 [8] allowed to extend the assembled contig to a 7860 nt long sequence, supported  
42 by 1,815,153 reads from multiple samples of date palm trees used in that study. Five ORFs were predicted  
43 using the Find ORF function in Geneious 8.1.9.

44 The assembled genomic sequence of the putative new virus is 7860 nt long excluding the poly(A) tail with  
45 36.4% of GC content (accession number BK011997). The genomic organization is similar to that of viruses  
46 from the genera *Foveavirus* and *Robigovirus* of the family *Betaflexiviridae* [1]. It consists of the 5' UTR  
47 (93 nt) followed by five ORFs encoding for structural and non-structural proteins, and a 278 nt of 3' UTR  
48 (Fig. 1a). ORF1 is 5514 nt long (1838 aa, 212 kDa) and encodes for a polyprotein that contains the  
49 methyltransferase, helicase and replicase domains, which were all the conserved domains of  
50 *Betaflexiviridae* family. The ORF1 shares the highest nt (49.92%) and aa (40.09%) sequence identities with  
51 garlic yellow mosaic-associated virus (GYMaV). ORF2, ORF3 and ORF4 were 705 nt (235 aa; 26.6 kDa),  
52 348 nt (116 aa; 12.7 kDa), 195 nt (65 aa; 7 kDa) long and encode the triple gene block 1, 2 and 3 (TGB1,  
53 TGB2 and TGB3), respectively, which are involved in cell-to-cell and long distance movement of the virus  
54 [9]. ORF5 encodes the coat protein (CP) gene which was 747 nt long (248 aa; 26.8kDa). The CP gene  
55 shared the highest identities (47.45% of nt and 36.40% aa sequences) with GYMaV.

56 Given that plants produce high amounts of virus-derived small RNAs (vsRNAs) upon infection, an  
57 additional dataset of ncRNA-seq from date palm trees (SRA accession numbers: SRR11553503 -  
58 SRR11553506) generated by an independent study was used to confirm whether the new putative virus  
59 indeed infects this host. Adapter sequences were determined using DNApi [10] and removed using  
60 cutadapt. Reads were mapped to the reference genome of the new putative virus sequence with BWA aln  
61 [5]. Reads containing up to one mismatch were extracted and sorted by size and 5' terminal nucleotide with  
62 SAMtools [11]. MISIS-2 [12] was used to get the new consensus sequence from this independent data.  
63 vsRNAs were distributed along almost the complete sequence covering 63.76% of the virus sequence with  
64 an average coverage depth of 160.54 (Fig. 1b), where viral hotspots for the production of vsRNA can be  
65 observed. An enrichment for 21 and 22 nt vsRNAs was noted (78.48% and 12.02%, respectively) (Fig. 1c),  
66 suggesting that Dicer-like protein 4 plays a major role in antiviral defenses of date palm trees against this  
67 virus [13]. Loading of small RNAs in the effector complexes is determined by the identity of the 5' end of  
68 the vsRNAs. Our analysis showed that most vsRNAs had a 5' end uridine (Fig. 1c), indicating that DPVA-  
69 derived vsRNAs are mainly loaded into Argonaute (AGO)1, and possibly AGO10 proteins [13]. The  
70 consensus sequence obtained from that alignment showed 96% and 98.2% similarity at the nt and aa level,  
71 respectively, with the reference genome of that new virus.

72 The taxonomic status of the virus was interrogated vis-à-vis to the current ICTV species and genus  
73 demarcation threshold for the family *Betaflexiviridae* [1]. The nt and aa pairwise sequence identity of its  
74 Rep and CP are much below the threshold of <72 % nt and <80% aa identity for a new species. Therefore,  
75 this virus belongs to a new species in the family *Betaflexiviridae*, provisionally named Date palm virus A.  
76 The pairwise nt identity of the Rep of DPVA with GYMaV is also below the genus demarcation threshold  
77 of the family *Betaflexiviridae* (<45%), suggesting that this new virus could be a member of a novel genus  
78 in the same family. But it should be more appropriate to use aa identities for genus demarcation due to  
79 mutational saturation. In order to check the presence of DPVA in individual samples (or trees) belonging  
80 to the same BioProject, trimmed data from each sample was mapped against the previously assembled  
81 DPVA sequence. This revealed two near-complete sequences annotated as DPVA M1 (BK011998; mean  
82 coverage depth = 85.7×) and DPVA F1 (BK011999; mean coverage depth = 55.9×). Both isolates share  
83 97.19% and 98.54% of nt identity and 96.85% and 97.90% of aa identity with the original DPVA sequence,  
84 respectively. Phylogenetic trees (Fig. 1d) were constructed with MEGA X [14] by the Neighbor-joining  
85 method with 1000 bootstrap replicates using the JTT+G substitution matrix. Phylogenetic analysis was  
86 performed with alignments of the Rep and CP with sequences available in the GenBank database that  
87 belong to the subfamily *Quinvirinae*. The DPVA isolates were positioned far from the species that are  
88 assigned to a genus of the *Quinvirinae* subfamily, and clustered closer to GYMaV in the Rep phylogeny  
89 with high support. Da Silva et al. (2019) considered that GYMaV constituted a distant evolutionary lineage  
90 in the *Betaflexiviridae* family and could be classified as a new genus in the family [15]. Both GYMaV and  
91 DPVA share similar genomic structure and evolutionary history. Therefore, these two viruses could be  
92 classified as members of a new genus, highlighting pitfalls on the current taxonomic criteria for genera in  
93 the family *Betaflexiviridae*. Inconsistencies in *Betaflexiviridae* taxonomic classification have already been  
94 noted, especially for the genus *Vitivirus* [16]. Date palm virus A is the first virus to be found in date palm  
95 trees. More studies have to be conducted to assess its epidemiology, transmission and pathogenic effect on  
96 the trees.

## 97 **Declarations**

98 **Funding:** This work was supported by CNPq (Conselho Nacional de Desenvolvimento Científico e  
99 Tecnológico, Brazil).

100 **Availability of data and materials:** The new DPVA isolates described here are available at GenBank  
101 Third Party Annotation database (accessions: BK011997- BK011999).

102 **Author's contributions:** JMFS and TN designed and supervised the study. AM performed data analysis  
103 and wrote the manuscript. All authors contributed to the review of the manuscript.

## 104 **Compliance with ethical standards**

105 **Conflicts of interest:** The authors declare that they have no conflict of interest.

106 **Research involving human participants and/or animals:** This work does not contain any animal or  
107 human participants.

108 **Informed consent:** This work does not contain any animal or human participants.

109 **References**

- 110 1. King AMQ, Adams MJ, Carstens EB, Lefkowitz EJ (2012) Family—betaflexiviridae, virus taxonomy.  
111 Elsevier, San Diego, pp 920-941
- 112 2. Zaid A (1999) Date palm cultivation. FAO, Roma 3. Lozano I, Morales FJ, Martinez AK, Pena EA  
113 (2010) Molecular characterization and detection of African oil palm ringspot virus. J Phytopathology  
114 158:167-172. <https://doi.org/110.1111/j.1439-0434.2009.01598.x>
- 115 4. Morales FJ, Lozano I, Velasco AC, Arroyave JA (2002) Detection of a fovea-like virus in African oil  
116 palms affected by a lethal ‘ringspot’ disease in South America. J Phytopathology 150:611-615.  
117 <https://doi.org/610.1046/j.1439-0434.2002.00820.x>
- 118 5. Li H, Durbin R (2009) Fast and accurate short read alignment with Burrows–Wheeler transform.  
119 Bioinformatics 25:1754-1760. <https://doi.org/1710.1093/bioinformatics/btp1324>
- 120 6. Li D, Liu C-M, Luo R, Sadakane K, Lam T-W (2015) MEGAHIT: an ultra-fast single-node solution  
121 for large and complex metagenomics assembly via succinct de Bruijn graph. Bioinformatics 31:1674-  
122 1676. <https://doi.org/1610.1093/bioinformatics/btv1033>
- 123 7. Altschul SF, Gish W, Miller W, Myers EW, Lipman DJ (1990) Basic local alignment search tool. J Mol  
124 Biol 215:403-10. [https://doi.org/10.1016/S0022-2836\(05\)80360-2](https://doi.org/10.1016/S0022-2836(05)80360-2)
- 125 8. Kears M, Moir R, Wilson A, Stones-Havas S, Cheung M, Sturrock S, Buxton S, Cooper A,  
126 Markowitz S, Duran C (2012) Geneious Basic: an integrated and extendable desktop software platform  
127 for the organization and analysis of sequence data. Bioinformatics 28:1647-1649.  
128 <https://doi.org/1610.1093/bioinformatics/bts1199>
- 129 9. Morozov SY, Solovyev AG (2003) Triple gene block: modular design of a multifunctional machine for  
130 plant virus movement. J Gen Virol 84:1351-1366. <https://doi.org/1310.1099/vir.1350.18922-18920>
- 131 10. Tsuji J, Weng Z (2016) DNApi: a de novo adapter prediction algorithm for small RNA sequencing  
132 data. PloS one 11:e0164228. <https://doi.org/10.1371/journal.pone.0164228>
- 133 11. Li H, Handsaker B, Wysoker A, Fennell T, Ruan J, Homer N, Marth G, Abecasis G, Durbin R (2009)  
134 The sequence alignment/map format and SAMtools. Bioinformatics 25:2078-2079.  
135 <https://doi.org/10.1093/bioinformatics/btp352>
- 136 12. Seguin J, Otten P, Baerlocher L, Farinelli L, Pooggin MM (2016) MISIS-2: A bioinformatics tool for  
137 in-depth analysis of small RNAs and representation of consensus master genome in viral quasispecies. J  
138 Virol Methods 233:37-40. <https://doi.org/10.1016/j.jviromet.2016.03.005>
- 139 13. Pooggin MM (2018) Small RNA-Omics for Plant Virus Identification, Virome Reconstruction, and  
140 Antiviral Defense Characterization. Front Microbiol. 9:2779. doi:10.3389/fmicb.2018.02779

- 141 14. Kumar S, Stecher G, Li M, Knyaz C, Tamura K (2018) MEGA X: molecular evolutionary genetics  
142 analysis across computing platforms. *Mol Biol and Evol* 35:1547-1549.  
143 <https://doi.org/10.1093/molbev/msy1096>
- 144 15. Da Silva LA, Oliveira AS, Melo FL, Ardisson-Araújo DMP, Resende FV, Resende RO, Ribeiro BM  
145 (2019) A new virus found in garlic virus complex is a member of possible novel genus of the family  
146 Betaflexiviridae (order Tymovirales). *Peer J* 7:e6285. <https://doi.org/6210.7717/peerj.6285>
- 147 16. Maree HJ, Blouin AG, Diaz-Lara A, Mostert I, Al Rwahnih M, Candresse T (2019) Status of the  
148 current vitivirus taxonomy. *Arch Virol* 6:1-8. <https://doi.org/10.1007/s00705-019-04500-w>
- 149

150 **Figure legend**

151 **Fig. 1** (a) Genomic organization of date palm virus A. The boxes show the positions of the five open reading  
152 frames. REP, replicase; TGB1, triple gene block 1; TGB2, triple gene block 2; TGB3, triple gene block 3;  
153 CP, coat protein; A(n), poly(A). (b) Distribution of vsRNAs along DPVA genome. (c) Number of small  
154 RNAs categories and their 5' nucleotide composition. (d) Neighbor-joining phylogenetic trees based on the  
155 amino acid sequences of the replicase protein (ReP) and the coat protein (CP) of members of the subfamily  
156 *Quinvirinae*. Trees were inferred with MEGA X. Alignments were performed with MAFFT. The newly  
157 characterized date palm A and its isolate M1 and F1 were also included. Citrus leaf blotch virus and  
158 grapevine virus A were used as outgroup for the REP and CP, respectively. SCSMaV, sugarcane striate  
159 mosaic-associated virus; AOPRV, african oil palm ringspot virus; SCGRMV, sour cherry green ring mottle  
160 virus; CRMaV, cherry rusty mottle associated virus; CTLaV, cherry twisted leaf associated virus; CNRMV,  
161 cherry necrotic rusty mottle virus; GYMaV, garlic yellow mosaic associated virus; DPVA, Date palm virus  
162 A; BanMMV, banana mild mosaic virus; RuCV-1, rubus canadensis virus 1; APV 1, asian prunus virus 1;  
163 APV 2, asian prunus virus 2; APV 3, asian prunus virus 3; ApLV, apricot latent virus; AGCaV, apple green  
164 crinkle associated virus; ASPV, apple stem pitting virus; GVT, grapevine virus T; GRSPaV, grapevine  
165 rupestris stem pitting associated virus 1.

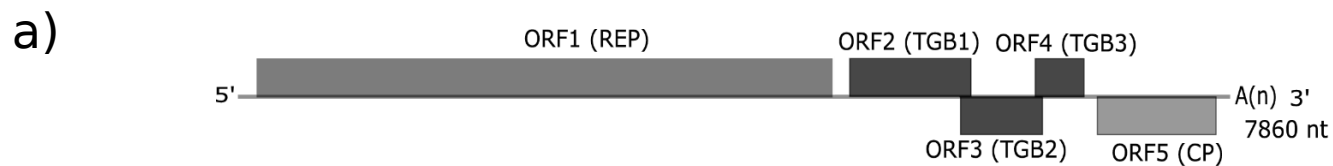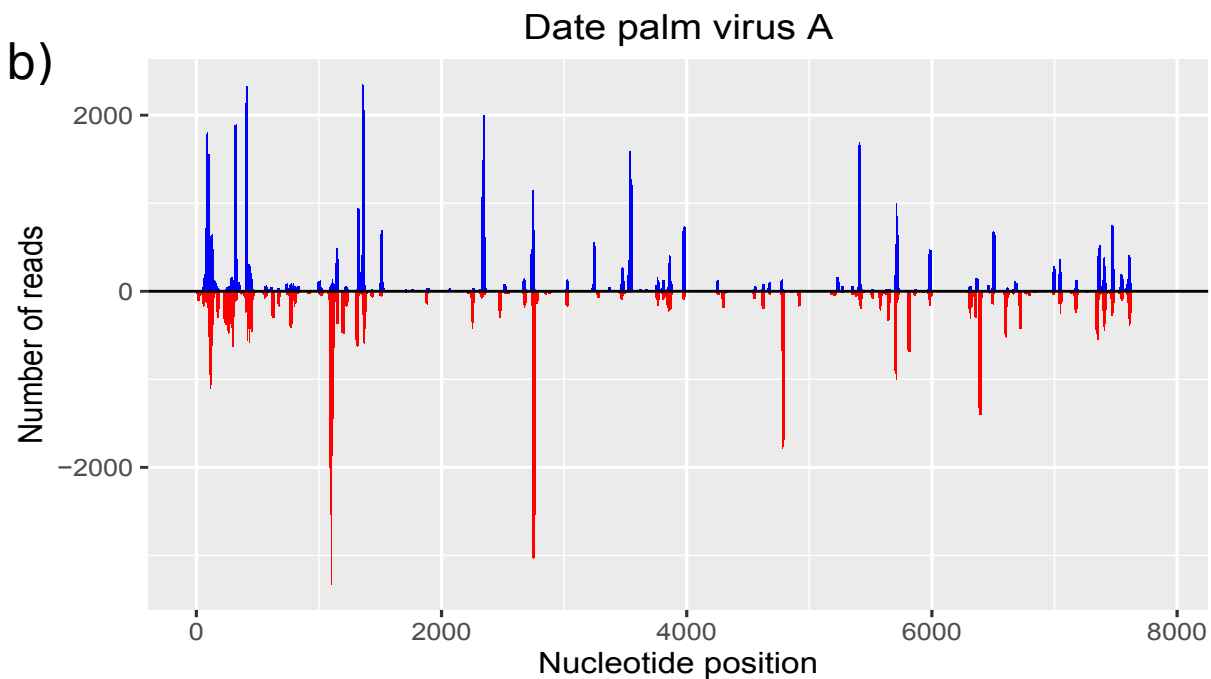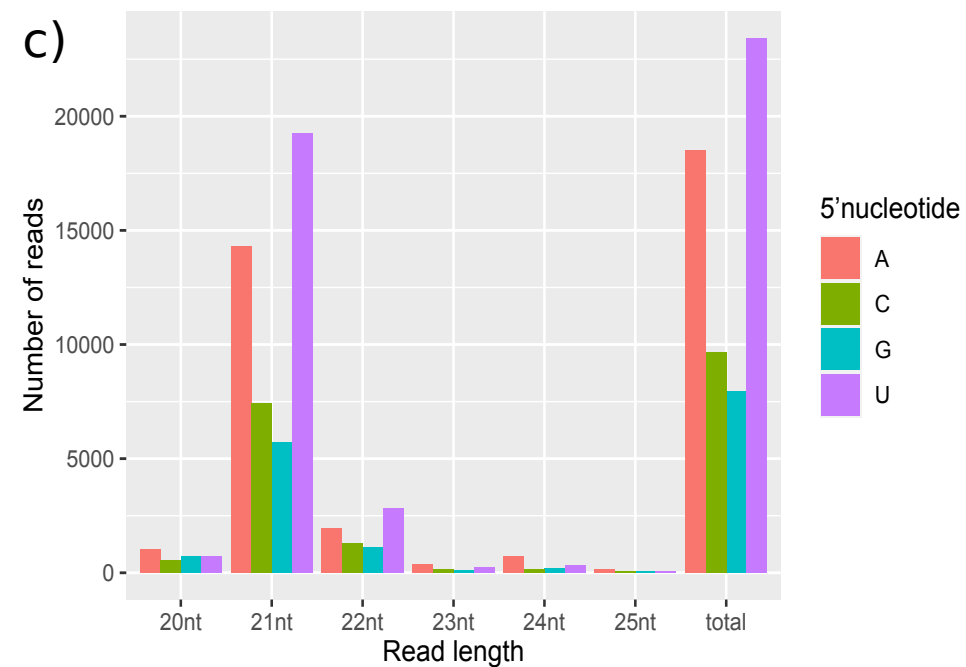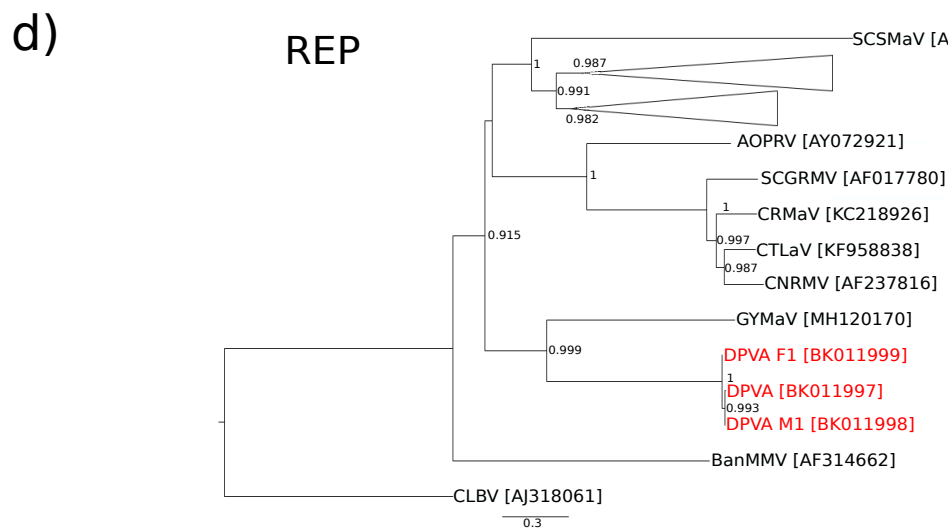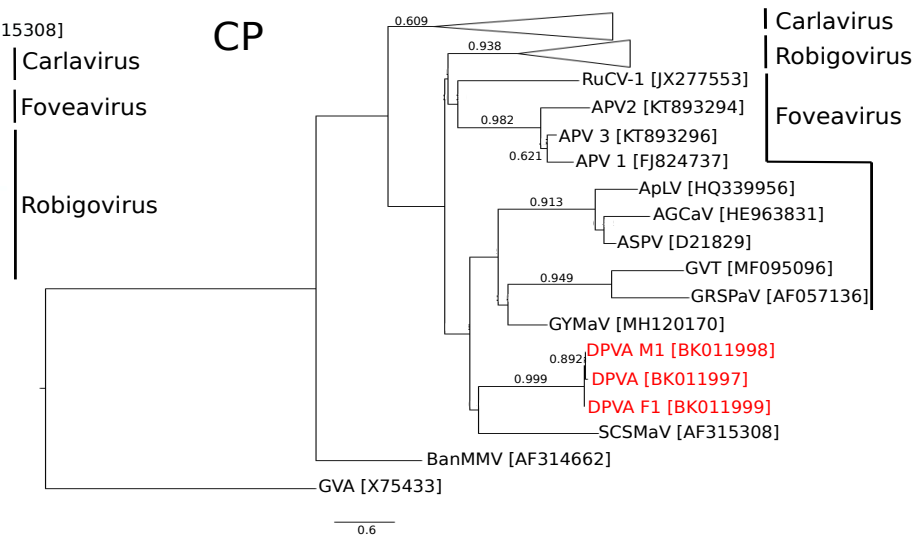

Source: https://www.biorxiv.org/content/10.1101/2020.08.31.275669v1.full.pdf
